# Supplementary material for: miR-302a-5p/367-3p-HMGA2 axis regulates malignant processes during endometrial cancer development
Source: PubMed Central journal article supplement (PMC5796297; doi:10.1186/s13046-018-0686-6), 2018-02-01

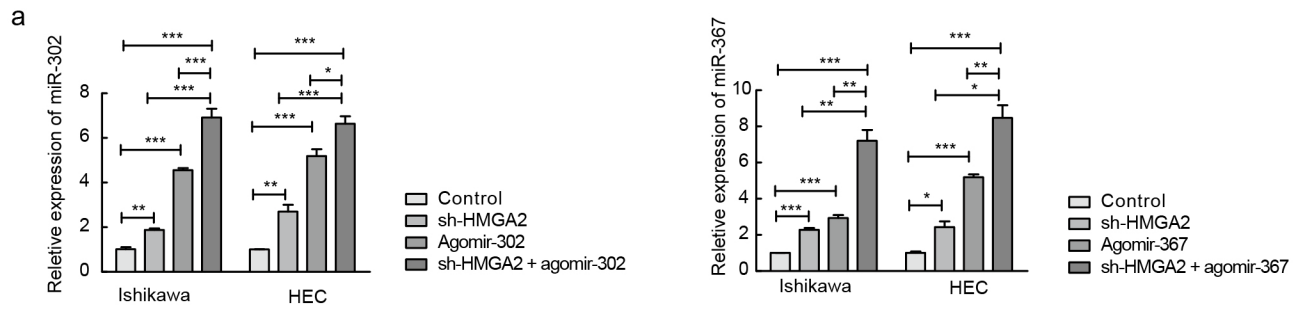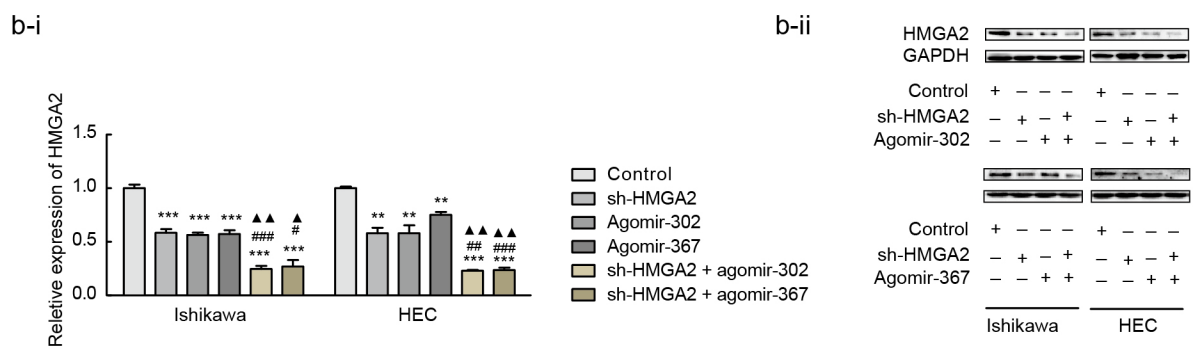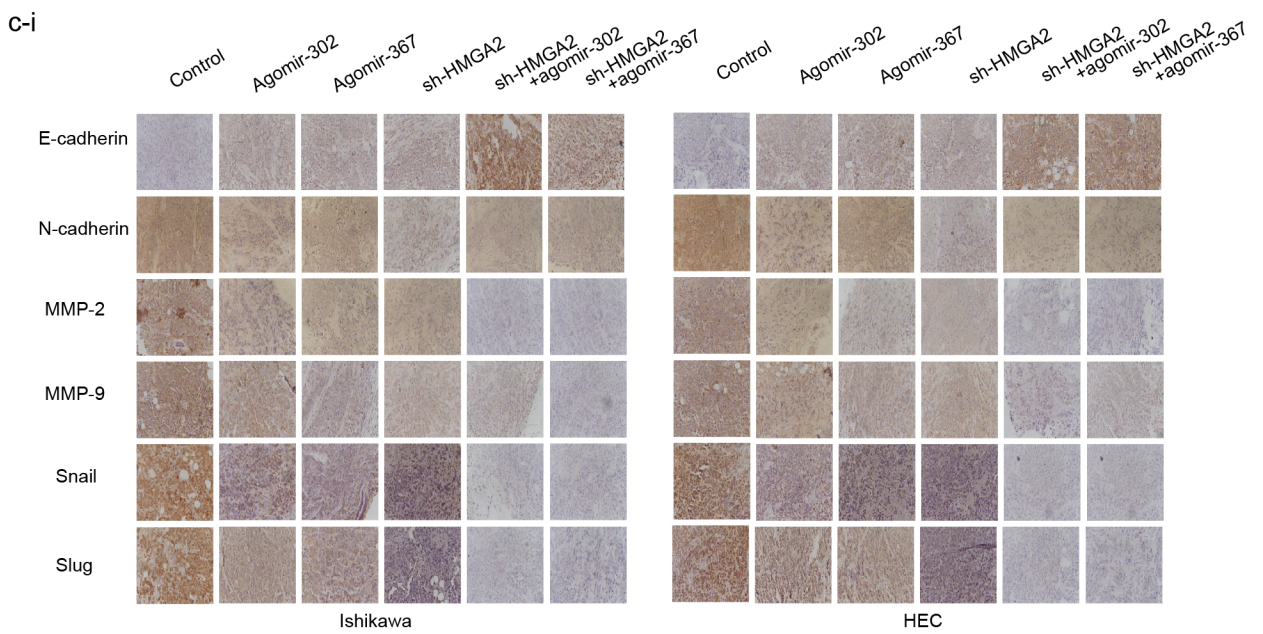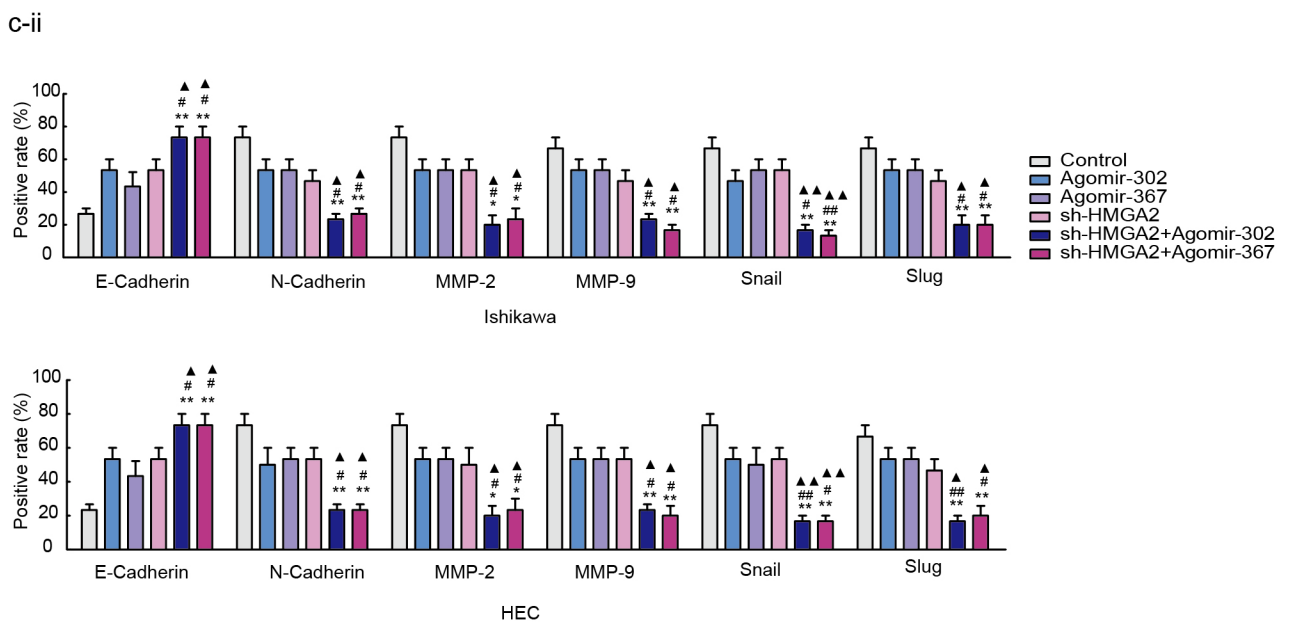

Supplement: 13046_2018_686_MOESM15_ESM.pdf [file 13046_2018_686_MOESM15_ESM.pdf]
